# All the ways your eyes can move if you don't look: Eyeball lifting, retraction and compression during blinks

Johannes Kirchner<sup>\*1,2</sup>, Tamara Watson<sup>3</sup>, Jochen Bauer<sup>2,4</sup>, and Markus Lappe<sup>1,2</sup>

<sup>1</sup>University of Münster, Institute for Psychology, 48149 Münster, Germany

<sup>2</sup>University of Münster, Otto-Creutzfeldt Center for Cognitive and Behavioural Neuroscience, 48149 Münster, Germany

<sup>3</sup>Western Sydney University, School of Psychology, NSW 2751, Australia

<sup>4</sup>University of Münster, Institute of Clinical Radiology, 48149 Münster, Germany

## 1 Abstract

2 Blinks occur frequently in normal life and have increasingly been linked to perceptual and cognitive effects. However,  
3 the oculomechanics of blink-related eye movements remain mostly uncharted territory. While it has been known  
4 for a long time that the eye is being pulled back into its socket during a blink due to co-contraction of extraocular  
5 muscles, this elusive eye motion has not been studied in detail due to the technical difficulties that go along with a  
6 closed eyelid. Here we use dynamic magnetic resonance imaging (MRI) to obtain videos of this motion and analyse  
7 the kinematics with the recently developed MREyeTrack algorithm. We show that the eye is not only retracted but  
8 also lifted up during a blink. For some participants we observed eyeball lifting by up to 3 mm, far exceeding the  
9 amount of translation believed to occur during natural eye movements. Slow blinks can be accompanied by large tonic  
10 rotations of up to 15°. Furthermore, we collected evidence that the co-contraction of extraocular muscles leads to a  
11 slight compression of the eyeball. These findings demonstrate the surprising complexity of ocular motility and offer  
12 new opportunities to study orbital mechanics in health and disease.

## 13 Introduction

14 Blinks are a fundamental aspect of the human visual system, occurring around 4 times per minute [1]. Their primary  
15 function is maintaining a healthy cornea by wetting and removal of irritants from its surface [2], but beyond that  
16 blinks are involved in a variety of tasks. The brief disruption of vision caused by blinks goes mostly unnoticed due  
17 to active visual suppression [3, 4] and is used to readjust the oculomotor system [5–7]. Blinks also play a crucial role  
18 in allocating attention and have, for example, been found to occur strategically timed in response to environmental  
19 tasks [8] and at key break points when watching videos [9]. Since damage to the eye from mechanical interference  
20 might easily lead to blindness, many species in the animal kingdom have a mechanism protecting the eye from harm.  
21 Giant guitarfish, like many fish and amphibians, cannot cover the eye with their lids, so they let the entire eye sink

---

\*Send correspondence to: [johannes.kirchner@uni-muenster.de](mailto:johannes.kirchner@uni-muenster.de)

22 completely into their head by contracting their eye muscles [10]. Mammals like guinea pigs and rabbits can cover their  
23 eyes by blinking, but this is also accompanied by retracting their eyes [11]. In order to do so, they have a specific  
24 muscle assigned to this, the retractor bulbi.

25 Humans do not have a retractor bulbi muscle, but their eyes nevertheless retract while blinking [2, 11–13]. This retraction  
26 is believed to be performed by co-contraction of several extraocular muscles [11, 14, 15]. The exact innervation  
27 pattern of this co-contraction has so far not been measured in humans. In rabbits, EMG recordings have shown that  
28 all extraocular muscles except the superior oblique contract, but it has been argued that the contraction of inferior and  
29 superior rectus would be sufficient to explain both retraction and rotational motion during blinks in humans [15]. The  
30 exact extent of the blink-related eye movement in humans has a somewhat controversial history. It was first described  
31 by Charles Bell in the early 19th century as a large upwards and outwards rotation. Reports of a more diverse motion  
32 followed but an upwards rotation was still found in the large majority of participants during visual observation when  
33 forcefully holding the lid open [16]. This upwards rotation found its way into neurology and ophthalmology textbooks  
34 as Bell's phenomenon and was assumed to take place during normal blinks as well. Modern studies using scleral  
35 search coils could not confirm this finding. Instead they showed that the eye rotated slightly downwards by 2–5° [14,  
36 15]. Around the same time evidence for eyeball retraction appeared [2, 11], which suggested that the blink-related  
37 eye movement is mainly a translational motion which is accompanied by some amount of incidental rotation [14, 15].  
38 The discrepancy with reports from visual observation could be somewhat resolved by the observation of large, tonic  
39 rotations for longer, forceful blinks but these could be either up- or downwards [14]. Some of the controversy remains  
40 and in particular detailed accounts of the translational motion during blinks are still missing.

41 Little is known about eyeball translation in general. Conventional eye tracking techniques like search coils, EOG or  
42 video-based methods do not measure translational motion and operate under the assumption that eye movements are  
43 purely rotational, yet small translations have been observed as a function of static gaze direction [17, 18], of changes in  
44 fixation distance [19] and during saccades [20]. Small translations probably do not have large perceptual consequences  
45 for the visual system, but they could still be of importance for the ocular mechanics due to changes in torque lever  
46 arms of the extraocular muscles [17]. Abnormal eyeball translation has also been observed in strabismus [21], with  
47 retraction even being the main syndrome in some rare cases [22, 23]. Blinks are unique among natural eye movements  
48 in that their main motion component is translation and not rotation.

49 In this study, we used high-speed dynamic MRI to record the blink-related eye movement from eleven participants at  
50 a temporal resolution of 52–54 ms. MRI allows to image an entire cross-section of the eye, which has the advantage  
51 of measuring eye movements even when the lid is closed and visualising displacements and deformations of the whole  
52 eyeball. Eyeball kinematics, in particular the translational motion, were estimated from single-slice data using the  
53 recently developed MREyeTrack algorithm [13]. Participants were instructed to fixate a dot which was presented at  
54 central gaze position and to make voluntary blinks of various durations. This allowed us to analyse the blink-related  
55 eye movement both during natural, short blinks as well as during prolonged periods of eye closure. We also investigated  
56 whether co-contraction might be accompanied by eyeball compression by tracking changes in eyeball diameter during  
57 blinks.

## 58 **Methods**

### 59 **Participants**

60 Eleven healthy participants (P1-P11, age 23-49, one female, ten males) took part in this study. Participants gave  
61 informed consent and all procedures were approved by the ethics committee of the Department of Psychology and  
62 Sports Science of the University of Münster.

### 63 **Experimental Setup**

64 Participants were examined by a 3T Philips Achieva MRI scanner (Philips Medical Systems, Best, The Netherlands).  
65 Instructions and visual stimuli were displayed using a back-projection monitor which was placed at a total viewing  
66 distance of 108 cm. First, we acquired 3D T2 weighted MR data of the entire head (matrix = 256 x 256 x 250, FOV  
67 = 250 x 250 x 250 mm, voxel size = 0.98 x 0.98 x 1.00 mm, TE = 225 ms, TR = 2500 ms, slice thickness = 2 mm, flip  
68 angle = 90°, scan duration = 232.5 s), which was used as a reference for planning the following dynamic single-slice  
69 scans. Eyeball motion was captured using a balanced steady-state free precession (bSSFP) sequence either in the axial  
70 plane (matrix = 224 x 224, FOV = 200 x 200, voxel size = 0.89 x 0.89 mm, TE = 1.28 ms, TR = 2.56 ms, slice  
71 thickness = 3 mm, flip angle = 45°, 1020 dynamic scans, total scan duration = 56.7s) at a temporal resolution of 55.6  
72 ms or in the sagittal plane (matrix = 224 x 224, FOV = 200 x 200, voxel size = 0.89 x 0.89 mm, TE = 1.24 ms, TR  
73 = 2.47 ms, slice thickness = 3 mm, flip angle = 45°, 1020 dynamic scans, total scan duration = 54.2s) at a temporal  
74 resolution of 53.1 ms. In both dynamic scan series a k-t BLAST factor of 5 were used to accelerate the acquisition  
75 per slice.

### 76 **Experimental Protocol**

77 During the initial T2 weighed 3D data acquisition, participants were instructed to fixate a black dot of 0.8° diameter  
78 on a grey background, so that eyeball motion could be minimized. During the dynamic bSSFP scans, participants  
79 had to execute one of the three tasks *Short Blink*, *Slow Blink* or *Eye Closure*, each while fixating the same black dot  
80 at center position. For the *Short Blink* task, participants were instructed to aim for a short, natural blink. Next,  
81 we asked participant to make their blinks a bit longer than usual during the *Slow Blink* task. Finally, participants  
82 were instructed to repeatedly close their eyes for a full second during the *Eye Closure* task. Each participant had  
83 to perform each task twice, once while recording the eye motion in the axial plane and once in the sagittal plane.  
84 We continuously monitored the imaging slice position between different acquisitions and adjusted the slice position  
85 if necessary to ensure that the lens was visible. For stimuli presentation and data analysis we used MATLAB (The  
86 MathWorks, Natick, MA, USA) with the Psychophysics Toolbox [24].

### 87 **Data Analysis**

88 **Preprocessing** Image intensities for all MR data were rescaled such that the intensities around eyeball center  
89 corresponded to a value of one. This was done in order to make the metrics of the subsequently used segmentation

90 algorithm comparable across participants and sequences. Furthermore, head motion in the dynamic bSSFP scans was  
91 estimated using an efficient sub-pixel image registration by cross-correlation algorithm [25].

92 **Eye Tracking** Eye motion in the dynamic bSSFP scans were quantified using the MREyeTrack algorithm described  
93 in Kirchner et al. [13], which allows to measure both rotational and translational motion components. The algorithm  
94 produces a segmentation of sclera, lens and cornea by finding the optimal projection of a 3D eyeball model for  
95 each image. We introduced the following minor modifications to the algorithm. Some of the MR recordings had  
96 artefacts in the anterior segment of the eyeball, in particular around the cornea. Therefore, we introduced weights  
97 to the individual components of the energy functional to be minimised in MREyeTrack. The original functional  
98  $E = E_{\text{sclera}} + E_{\text{lens}} + E_{\text{cornea}}$  consisted of equal contributions from sclera, lens & cornea, which we changed to  
99  $E = E_{\text{sclera}} + 0.5 * E_{\text{lens}} + 0.25 * E_{\text{cornea}}$  to make it more robust to artefacts in the anterior segment of the eye. Also,  
100 we constricted out-of-plane translation to a maximum of 3 mm and out-of-plane rotation completely. The obtained  
101 eye motion time series data was upsampled to a 2 ms time interval via linear interpolation and then smoothed using  
102 a Savitzky-Golay filter of 2nd order with a window of 100 ms [26] for further analysis.

103 **Blink detection** Simultaneous measurements of pupil area and eyeball translation have shown that blinks are  
104 always accompanied by translation [13]. Therefore, we defined and detected blinks in our data based on the measure  
105 of eyeball translation along the anterior-posterior axis, i.e. retraction, which is present in both sagittal and axial MR  
106 recordings. The eye retracts at relatively high velocity during lid closure, so blinks were coarsely located by finding  
107 samples where the retraction velocity exceeded 2 mm/s. Blink onset was then defined as the first sample the velocity  
108 exceeded 1 mm/s. Accordingly, blink offset was determined when the eye propelled back and subceeded a velocity of  
109 1 mm/s. We required blinks to have a minimum duration of 100 ms and a minimum retraction of 0.3 mm.

110 **Eyeball compression** The MREyeTrack algorithm works with a rigid eyeball model and therefore does not incor-  
111 porate eyeball compression, which could hypothetically occur due to the co-contraction of several extraocular muscles  
112 during a blink. To investigate this, we calculated the longitudinal and transversal diameter of the eyeball during short  
113 blinks. The longitudinal diameter was defined along the axis running through both eyeball and lens center, while  
114 the transversal eyeball diameter was defined to be perpendicular to that. Borders of these diameters were defined  
115 as the locations where the image intensities fell below a value of 0.5. Only the posterior border required a different  
116 threshold, because the tissue behind it was often of higher intensity. Therefore, the posterior border was determined  
117 as the average intensity between 3 mm before and after the MREyeTrack segmentation (see Fig. 5a for illustration).

118 **Data exclusion criteria** MRI is prone to susceptibility artefacts at natural interfaces like that of air and tissue,  
119 which can manifest themselves as a local distortion of the magnetic field and subsequent loss of anatomic structure  
120 in the image. MR recordings of some participants showed a loss of anatomic structure at the anterior segment of the  
121 eye. If these artefacts are small, the MREyeTrack algorithm still produces a reliable segmentation of sclera, lens and  
122 cornea. In order to determine whether the segmentation was of sufficient quality, we calculated the average energy  
123 functionals of sclera, lens and cornea for all participants (Table 1). Axial recordings were deemed unreliable if the

124 functionals of cornea or lens were below 1.5, while this threshold was set at 0.5 for sagittal recordings. This excluded  
125 P1 and P3 from the analysis of axial recordings and P7 and P11 from sagittal recordings.

|                     |          | P1   | P2   | P3   | P4   | P5   | P6   | P7   | P8   | P9   | P10  | P11  |
|---------------------|----------|------|------|------|------|------|------|------|------|------|------|------|
| E <sub>sclera</sub> | Axial    | 2.47 | 2.17 | 2.26 | 2.26 | 2.25 | 2.31 | 2.30 | 2.42 | 2.43 | 2.35 | 2.42 |
|                     | Sagittal | 2.13 | 2.15 | 2.10 | 2.04 | 2.63 | 2.17 | 1.68 | 2.09 | 2.08 | 2.02 | 1.73 |
| E <sub>cornea</sub> | Axial    | 1.16 | 2.80 | 1.67 | 1.50 | 2.43 | 2.48 | 2.94 | 1.50 | 1.53 | 1.98 | 2.29 |
|                     | Sagittal | 1.04 | 1.10 | 1.98 | 0.67 | 2.22 | 0.90 | 0.42 | 1.34 | 0.76 | 1.02 | 0.10 |
| E <sub>lens</sub>   | Axial    | 2.53 | 2.74 | 1.40 | 2.95 | 2.46 | 2.91 | 2.77 | 2.67 | 2.31 | 2.82 | 2.95 |
|                     | Sagittal | 2.43 | 2.75 | 2.70 | 2.78 | 2.87 | 2.90 | 2.07 | 2.66 | 2.55 | 2.95 | 2.30 |

**Table 1:** Data quality assessment for each participant. Individual energy functional of sclera, cornea and lens as determined by normal gradient matching averaged over either all sagittally or axially acquired bSSFP scans (look into Kirchner et al. [13] for details about normal gradient matching).

125

## 126 Results

### 127 Comparison of binocular retraction

128 To get an estimate of how precisely eyeball translation can be estimated from our data by the MREyeTrack algorithm,  
129 we compared anterior-posterior eyeball motion between both eyes from axial scans of the *Slow Blink* task. Throughout  
130 this study we refer to this motion as retraction, which is the posterior motion of the eyeball center during the fixation  
131 of the target dot. Since both eyes likely receive the same neural innervation during blinks, we expected that the two  
132 eyes exhibit the same translational motion. Indeed, we found high agreement between the measures of retraction  
133 between the two eyes for all participants (Fig. 1b,c & Movie 1). Individual data points lie almost entirely on the  
134 identity line, indicating that both timing and amplitude of the retraction is almost identical between both eyes and  
135 that each eye receives the same neural innervation during blinks. The residuals from linear regression analysis had an  
136 average standard deviation of 0.12 mm, which is in agreement with modelling results from Kirchner et al. [13]. They  
137 claimed that eyeball translation could be estimated with a precision of 0.15 mm, based on comparing ground truth  
138 translation from artificial MR data with the estimated translation using the MREyeTrack algorithm.

### 139 Translational eyeball motion during blinks

140 We analysed eyeball translation along all three axes, i.e. translation from anterior to posterior which we called  
141 retraction, translation from inferior to superior which we called lifting and translation from medial to lateral. We  
142 observed only very little translational motion along the medial to temporal axis, which was typically in the range of  
143 0.1 to 0.2 mm. No participant in any of the tasks showed medial or lateral translational motion of more than 0.5 mm.  
144 We focused the remainder of our analysis of translation on the measures of retraction and lifting in the sagittal plane.  
145 Retraction and lifting followed an identical time course, but lifting was often much larger than retraction (Fig. 2a  
146 & Movie 2). For each participant, the ratio of lifting and retraction was constant for all blinks, meaning that blinks  
147 with a larger retraction also showed a proportionally larger lifting. Across participants, the ratio between lifting and  
148 retraction differed. For half of the participants the amount of lifting and retraction was roughly equal, while lifting  
149 was larger than retraction for the other half (Fig. 2b). Averaged across participants, the eyeball retracted by 0.79

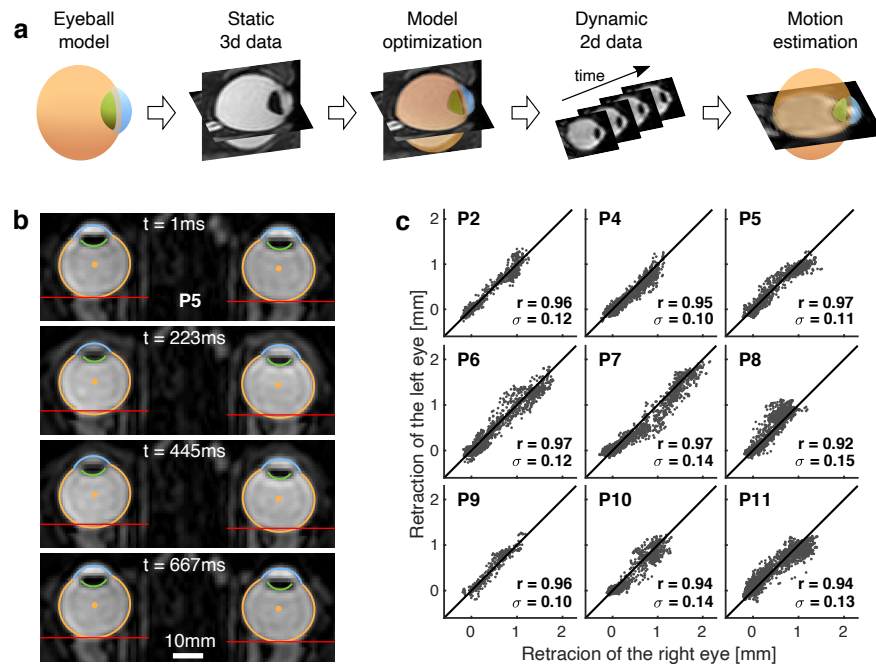

**Figure 1:** Estimation of eyeball motion using MREyeTrack. **a**, Illustration of the MREyeTrack workflow. An eyeball model consisting of sclera (orange), cornea (blue) and lens (green) is fitted to T2 weighted 3D data for each eye of each participant. Eyeball motion is then estimated by determining the optimal 2D projection of the eyeball model for each image of the dynamic MR scans. Reprinted from Kirchner et al. [13]. **b**, Axial recording of eyeball retraction during a blink of participant P5. Time is aligned to blink onset. The red lines are placed at the posterior eyeball border of the first image. The two middle images show simultaneous retraction of both eyes of around 1 mm. **c**, Comparison of retraction between left and right eye during the *Slow Blink* task for each participant. Each panel shows Pearson's  $r$  and the standard deviation  $\sigma$  of the residuals from linear regression analysis.

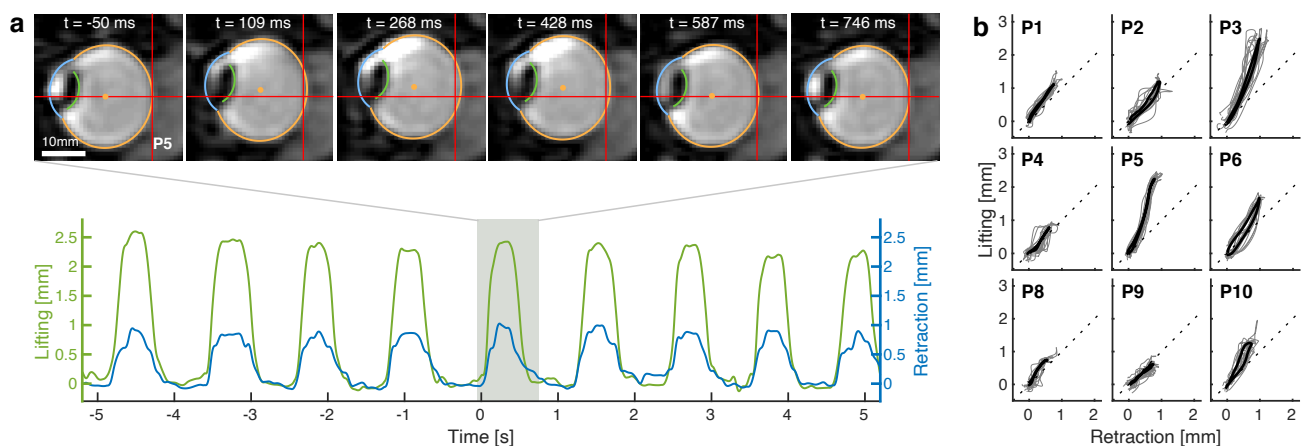

**Figure 2:** Eyeball lifting and retraction during blinks. **a**, Sagittal recording of eyeball lifting and retraction during the *Slow Blink* task of participant P5. Selected snapshots illustrate the translational eyeball motion with a red horizontal line placed at center position and a red vertical line at posterior border position of the first image. **b**, Translational eyeball trajectory during of each participant during the *Slow Blink* task. 10 randomly selected single trials are shown in grey, the average over all blink trajectories as a thick black line. Dotted line is the identity function. Note that the lifting component is at least as large as the retraction component and may even be twice as large.

150 mm (SD = 0.16 mm) and lifted by 1.35 mm (SD = 0.67 mm) during the *Slow Blink* task, showing that lifting is both  
151 larger and more variable than retraction. The maximum amount of overall translation that we measured throughout  
152 the experiment was 3.33 mm during a slow blink of P3.

### 153 Holding state for prolonged lid closure

154 While the translational trajectories associated with blinks were fairly stereotypical when performing the same task,  
155 we often observed that amplitudes for the *Short Blink* task were smaller compared to the *Slow Blink* task. For even  
156 longer periods of lid closure during the *Eye Closure* task, there was no further increase in amplitude but instead the  
157 eyes held out in a retracted and lifted state while the eyes remained closed (Fig. 3a,b & Movie 3). This holding state  
158 was typically reached after 200-300 ms, sometimes following a slight decay from full amplitude. Blinks performed  
159 during the *Short Blink* task often did not last long enough to reach this holding state, but nevertheless followed the  
160 same translational trajectory (Fig. 3c). In particular participants P3 & P6 showed a much smaller amplitude during  
short blinks, while their translational trajectory still overlapped with those of slow blinks and eye closures.

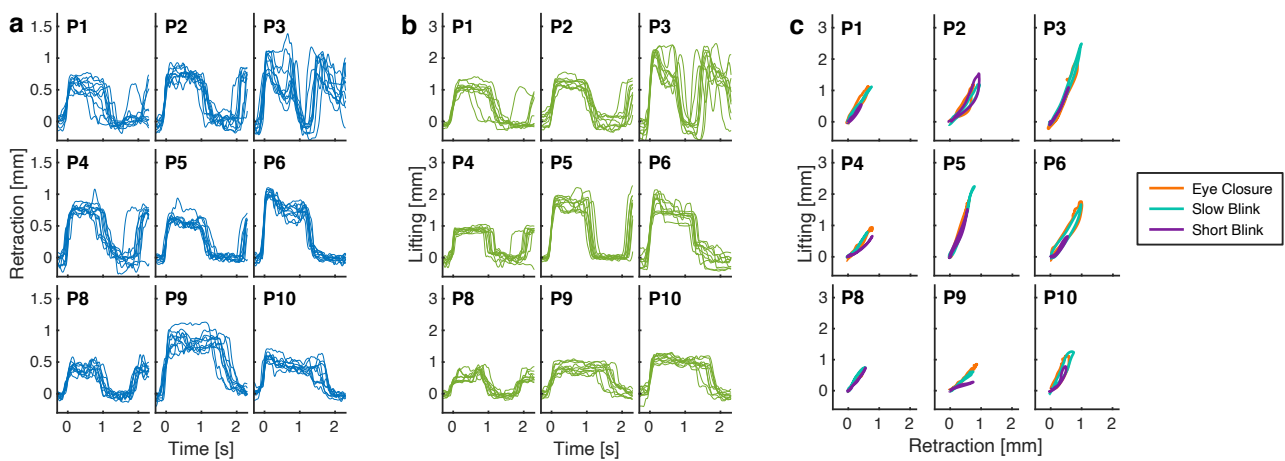

**Figure 3:** Holding state for prolonged eyelid closure. **a**, Retraction trajectory of 10 randomly selected trials from the *Eye Closure* task. After reaching full amplitude after around 200 milliseconds, the eyeball holds out in retracted location until the eyes are being opened again. **b**, The lifting component follows the same course as the retraction component and holds out after reaching full amplitude. Note the different scale compared to the retraction component. **c**, Averaged translational trajectories for each task of each participant. For many participants, the translation during short blinks does not reach full amplitude but follows the same path.

161

### 162 Rotational eyeball motion during blinks

163 Rotations during short blinks in both axial and sagittal plane could be in either direction and could typically be  
164 described as monophasic motion with an amplitude in the range of 1-4°. This is in agreement with previous search  
165 coil studies, which investigated the rotational component of the blink-related eye movement in great detail [14, 15].  
166 An interesting observation we made in our data from sagittal scans, was that some participants exhibited very large  
167 rotations for longer blinks. Most noticeably, P1 rotated upwards by up to 17° during the *Slow Blink* task (Fig. 4a &  
168 Movie 4), but their rotations during short blinks were confined to 2° at maximum. These excessive rotations during  
169 slower blinks also lagged the onset of eyeball retraction by 100 ms and became larger with longer blink durations.  
170 Only some participants made these excessively large rotations which were also highly variable within participants and

could be either up- or downwards (Fig. 4b).

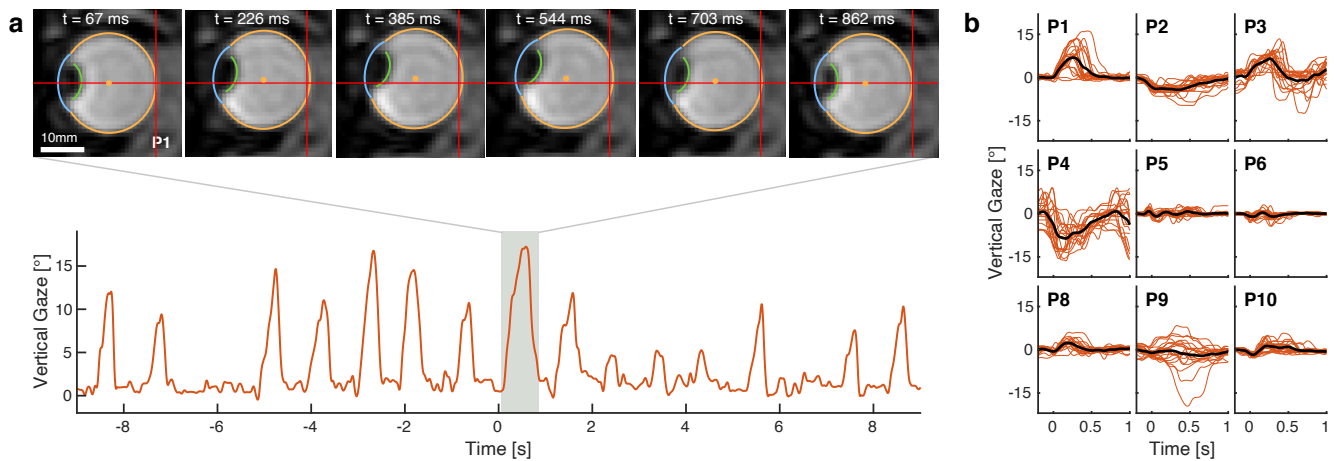

**Figure 4:** Eyeball rotation during blinks of long duration. **a**, Sagittal recording of vertical eyeball rotation during the *Slow Blink* task of participant P1. Selected snapshots show large rotational motion which scaled with blink duration. **b**, Rotational trajectories of 10 randomly selected blinks from the *Slow Blink* task for each participant as thin red lines and the averaged trajectory over all trials as thick black line.

171

## 172 Eyeball compression

173 Since both origin and pulleys of the rectus muscles are located posterior to eyeball center, it is not unreasonable to  
174 assume that co-contraction of all 4 rectus muscles could compress the eyeball along the line of sight. Therefore, we  
175 calculated two measures of eyeball shape. The longitudinal diameter was defined as the distance from the border of the  
176 lens and vitreous body to the retina along the line of sight and through the eyeball center. The transversal diameter  
177 was defined to run perpendicular to the longitudinal diameter and passing through eyeball center (Fig. 5a). Only  
178 sagittal recordings were used for this analysis, because they contain less out-of-plane motion than axial recordings.  
179 Then, we tracked changes in diameter during the *Short Blink* task. We observed a sharp, consistent decrease in  
180 longitudinal diameter closely time-locked to blink onset for every single participant in the range of 0.30 to 0.85 mm  
181 (Fig. 5b). On average, the longitudinal diameter decreased by 0.59 mm (SD = 0.21 mm). In contrast to that, the  
182 transversal diameter remained constant for most participants and decreased only slightly for others (Fig. 5c). Even  
183 though the decrease in longitudinal diameter is small, it is visible in the MR footage by the posterior displacement  
184 of the border between lens and vitreous body relative to the segmentation (Fig. 5d & Movie 5). Based on the video  
185 recordings, it was not clear to us whether this posterior lens movement could also be explained by an increase in lens  
186 diameter like during accommodation. In the video, it rather looks like the whole lens is moving posterior relative to  
187 eyeball center which would be consistent with eyeball compression. The anterior segment around the cornea is not  
188 well visible though, so the option of lens accommodation cannot be ruled out just by observing the video footage.

## 189 Discussion

190 Our results provide a detailed account of the full motion trajectory of blink-related eye movements. We demonstrated  
191 that the eyeball not only retracts but also lifts during a blink, and that the lifting component is on average almost



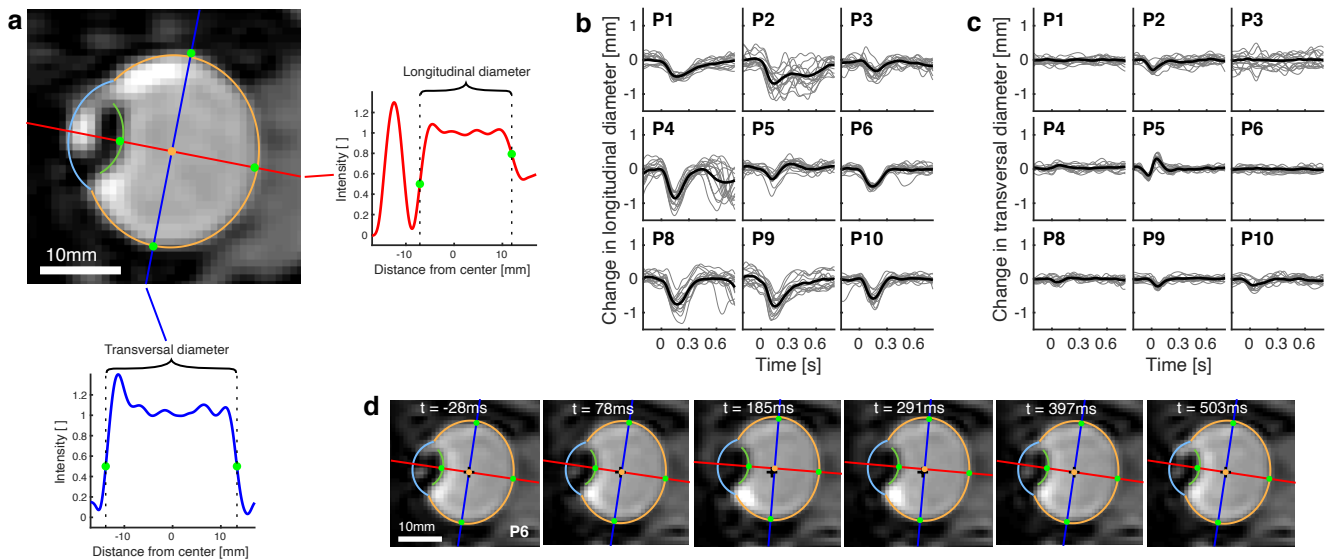

**Figure 5:** Eyeball compression during blinks. **a**, Illustration of calculation of longitudinal and transversal diameter based on image intensities relative to eyeball center. The orange marker is located at eyeball center, the green markers at eyeball borders. **b**, Change in longitudinal diameters during the *Short Blink* task, aligned to blink onset. 15 randomly selected trials as thin grey lines, average over all trials as thick black line. **c**, Same for change in transversal diameter. **d**, MR images of a short blink of participant P6. The black crosshairs mark eyeball center location in the first image. The green marker at the border between eyeball and lens moves posterior relative to lens segmentation in the two middle images.

192 twice as large as the retraction component. Only for blinks of longer duration does the translational motion reach its  
 193 full amplitude and it then remains in a holding state for as long as the eyes are closed. For some participants, we  
 194 also observed unusually large vertical rotations for blinks of longer durations, which lagged the onset of translational  
 195 motion by a few dozen milliseconds. Furthermore, we investigated evidence for eyeball compression and found that the  
 196 longitudinal diameter decreased by over half a millimeter while the transversal diameter remained roughly constant.  
 197 This implies that the change in longitudinal diameter is not caused by out-of-plane motion of the eyeball, but is instead  
 198 (we would argue) due to eyeball compression. These results show that the motion repertoire of eye movements is more  
 199 complex than previously thought and raise some interesting questions regarding the innervation of extraocular muscles  
 200 and orbital mechanics.

201 Blink-related eye movements were previously thought of as a combination of retraction and rotation. Our results  
 202 show that eyeball lifting is an additional major component of the blink-related eye movement, arguably even its main  
 203 component, and was found to occur consistently both during very short blinks and long periods of voluntary eye  
 204 closure. This finding strengthens the hypothesis that the blink-related eye movement is primarily a translational  
 205 motion due to co-contraction of extraocular muscles and that the accompanying rotational motion is an incidental  
 206 derivative of the global translation [11, 14, 15]. In agreement with previous studies, we observed large tonic rotations  
 207 during longer blinks but these were not only upwards but could be downwards as well [13, 14]. Large rotations during  
 208 long or forceful blinks certainly contribute to the controversial reports regarding Bell's phenomenon, but it is still  
 209 puzzling why upwards rotation is predominantly observed during visual observation [16]. We think that the finding of  
 210 eyeball lifting could explain the discrepancy between visual observation and modern eye tracking techniques. Lifting,  
 211 like upwards rotation, leads to an elevation of the pupil which could lead to confusion of translational and rotational

212 motion during visual observation where eyeball movement is deduced from movement of the pupil. For example, a 5°  
213 upwards rotation of an eyeball with a typical diameter of 26 mm elevates the pupil by 1.1 mm. This implies that a 2°  
214 downwards rotation paired with 1.4 mm of lifting would lead to an elevation of the pupil.

215 The observation of eyeball lifting also sheds new light on the neural innervation of extraocular muscles during blinks.  
216 It had been suggested that the co-contraction of inferior and superior rectus muscles would be sufficient to explain the  
217 blink-related eye movement [15], but the novel finding of eyeball lifting shows that other muscles must be involved as  
218 well. Our results suggest an activation of the superior oblique in order to explain eyeball lifting. It might be possible  
219 that there is an imbalance between superior oblique and its antagonist the inferior oblique, but this might not even be  
220 necessary. The superior oblique is unique among the six eye muscle in that its tendon is guided through the trochlea  
221 before innervating the eyeball. The other eye muscles have soft tissue pulleys which actively move when the muscle  
222 contracts [27, 28]. The pulley of the superior oblique however is the rigid trochlea, which produces additional leverage  
223 on the eyeball from the superior oblique presumably leading to an eyeball lift. Additional evidence for an active role of  
224 the superior oblique in eyeball lifting comes from the analysis of global eyeball position as a function of gaze direction  
225 [18]. It was found that downwards gaze, which is accomplished by the contraction of inferior rectus and superior  
226 oblique, lifts up the eyeball. In contrast, the contraction of superior rectus and inferior oblique produces upwards gaze  
227 but lowers the eyeball as a whole. Interestingly, EMG recordings in rabbits have shown that all extraocular muscle  
228 except the superior oblique contract during blinks [11]. Rabbits, like many mammals, have a retractor bulbi, an eye  
229 muscle which is specifically responsible for eyeball retraction. Perhaps the superior oblique has taken over this task in  
230 humans.

231 Our results further suggest that simultaneous contraction of the rectus muscles lead to a slight compression of the  
232 eyeball. Based on the video recordings, we considered whether the decrease in longitudinal diameter really reflects  
233 eyeball deformation or instead could be explained by lens accommodation. However, we are not aware of any reports  
234 on accommodation during blinks and an earlier MRI study showed that the lens diameter increased by only 0.33 mm  
235 on average during accommodation [29]. This is too small to explain the 0.59 mm decrease in longitudinal diameter  
236 that we observed. Additionally, it seems plausible to us that the enlarged force applied by the eye muscles during  
237 blinks is powerful enough to result in a slight deformation. In this context, it would be interesting to investigate  
238 whether the amount of force exerted on the eyeball by compression and translation could have long term effects on  
239 the eyeball shape and might even be related to certain pathologies. There are other examples in the literature where  
240 mechanical force being exerted on the eye has been suggested have long term consequences. For example, the force  
241 exerted by eye rubbing has been hypothesised to be the cause of keratoconus [30].

242 Dynamic MRI proved to be a valuable tool to study ocular motility during blinks. We obtained detailed trajectories of  
243 this motion using the MREyeTrack algorithm. We found that the blink-related eye movement could be accompanied  
244 by translations of up to 3.3 mm, far exceeding the extent previously reported. Given the frequency of blinks in normal  
245 life, these translations should be considered a fundamental part of oculomotor control. To the best of our knowledge,  
246 translations of this magnitude have so far not been incorporated in biomechanical modelling of the oculomotor plant.  
247 Therefore, blink-related eye movements could be used to test the validity of different models. Future studies could  
248 focus on the effect of blinking and the affiliated co-contraction on extraocular muscles and the pulley system.

249 **Data availability** All data are available from the corresponding author upon reasonable request.

250 **Acknowledgments** This work has received funding from the European Union’s Horizon 2020 research and innova-  
251 tion programme under the Marie Skłodowska-Curie grant agreement No. 734227.

## 252 References

- 253 1. Barbato, G. *et al.* Diurnal Variation in Spontaneous Eye-Blink Rate. *Psychiatry Research* **93**, 145–151. doi:10.  
254 1016/s0165-1781(00)00108-6 (2000).
- 255 2. Doane, M. G. Interactions of Eyelids and Tears in Corneal Wetting and the Dynamics of the Normal Human  
256 Eyeblink. *American Journal of Ophthalmology* **89**, 507–516. doi:10.1016/0002-9394(80)90058-6 (1980).
- 257 3. Volkman, F. C., Riggs, L. A. & Moore, R. K. Eyeblinks and Visual Suppression. *Science* **207**, 900–902. doi:10.  
258 1126/science.7355270 (1980).
- 259 4. Hari, R., Salmelin, R., Tissari, S. O., Kajola, M. & Virsu, V. Visual Stability during Eyeblinks. *Nature* **367**,  
260 121–122. doi:10.1038/367121b0 (1994).
- 261 5. Khazali, M. F., Pomper, J. K., Smilgin, A., Bunjes, F. & Thier, P. A New Motor Synergy That Serves the  
262 Needs of Oculomotor and Eye Lid Systems While Keeping the Downtime of Vision Minimal. *eLife* **5**, e16290.  
263 doi:10.7554/eLife.16290 (2016).
- 264 6. Khazali, M. F., Pomper, J. K. & Thier, P. Blink Associated Resetting Eye Movements (BARMs) Are Functionally  
265 Complementary to Microsaccades in Correcting for Fixation Errors. *Scientific Reports* **7**, 16823. doi:10.1038/  
266 s41598-017-17229-w (2017).
- 267 7. Maus, G. W. *et al.* Target Displacements during Eye Blinks Trigger Automatic Recalibration of Gaze Direction.  
268 *Current Biology* **27**, 445–450. doi:10.1016/j.cub.2016.12.029 (2017).
- 269 8. Hoppe, D., Helfmann, S. & Rothkopf, C. A. Humans Quickly Learn to Blink Strategically in Response to Envi-  
270 ronmental Task Demands. *Proceedings of the National Academy of Sciences* **115**, 2246–2251. doi:10.1073/pnas.  
271 1714220115 (2018).
- 272 9. Nakano, T., Kato, M., Morito, Y., Itoi, S. & Kitazawa, S. Blink-Related Momentary Activation of the Default  
273 Mode Network While Viewing Videos. *Proceedings of the National Academy of Sciences* **110**, 702–706. doi:10.  
274 1073/pnas.1214804110 (2013).
- 275 10. Tomita, T. *et al.* Eye Retraction in the Giant Guitarfish, *Rhynchobatus Djiddensis* (Elasmobranchii: Batoidea):  
276 A Novel Mechanism for Eye Protection in Batoid Fishes. *Zoology* **119**, 30–35. doi:10.1016/j.zool.2015.09.004  
277 (2016).
- 278 11. Evinger, C., Shaw, M. D., Peck, C. K., Manning, K. A. & Baker, R. Blinking and Associated Eye Movements in  
279 Humans, Guinea Pigs, and Rabbits. *Journal of Neurophysiology* **52**, 323–339. doi:10.1152/jn.1984.52.2.323  
280 (1984).

- 281 12. Mas, D. *et al.* Noninvasive Measurement of Eye Retraction during Blinking. *Optics Letters* **35**, 1884–1886.  
282 doi:10.1364/OL.35.001884 (2010).
- 283 13. Kirchner, J., Watson, T. & Lappe, M. Real-Time MRI Reveals Unique Insight into the Full Kinematics of Eye  
284 Movements. *eNeuro* **9**. doi:10.1523/ENEURO.0357-21.2021 (2022).
- 285 14. Collewijn, H., van der Steen, J. & Steinman, R. M. Human Eye Movements Associated with Blinks and Prolonged  
286 Eyelid Closure. *Journal of Neurophysiology* **54**, 11–27. doi:10.1152/jn.1985.54.1.11 (1985).
- 287 15. Bour, L. J., Aramideh, M. & de Visser, B. W. Neurophysiological Aspects of Eye and Eyelid Movements during  
288 Blinking in Humans. *Journal of Neurophysiology* **83**, 166–176. doi:10.1152/jn.2000.83.1.166 (2000).
- 289 16. Francis, I. C. & Loughhead, J. A. Bell’s Phenomenon. A Study of 508 Patients. *Australian Journal of Ophthal-*  
290 *mology* **12**, 15–21 (1984).
- 291 17. Demer, J. L. & Clark, R. A. Translation and Eccentric Rotation in Ocular Motor Modeling. *Progress in Brain*  
292 *Research* **248**, 117–126. doi:10.1016/bs.pbr.2019.04.036 (2019).
- 293 18. Moon, Y. *et al.* Positional Change of the Eyeball During Eye Movements: Evidence of Translatory Movement.  
294 *Frontiers in Neurology* **11**, 556441. doi:10.3389/fneur.2020.556441 (2020).
- 295 19. Enright, J. T. Ocular Translation and Cyclotorsion Due to Changes in Fixation Distance. *Vision Research* **20**,  
296 595–601. doi:10.1016/0042-6989(80)90116-9 (1980).
- 297 20. Enright, J. T. The Aftermath of Horizontal Saccades: Saccadic Retraction and Cyclotorsion. *Vision Research*  
298 **26**, 1807–1814. doi:10.1016/0042-6989(86)90132-x (1986).
- 299 21. Moon, Y. *et al.* Quantitative Analysis of Translatory Movements in Patients With Horizontal Strabismus. *Invest-*  
300 *igative Ophthalmology & Visual Science* **62**, 24. doi:10.1167/iovs.62.15.24 (2021).
- 301 22. Osher, R. H., Schatz, N. J. & Duane, T. D. Acquired Orbital Retraction Syndrome. *Archives of Ophthalmology*  
302 **98**, 1798–1802. doi:10.1001/archoph.1980.01020040650012 (1980).
- 303 23. Yüksel, D., Orban de Xivry, J.-J. & Lefèvre, P. Review of the Major Findings about Duane Retraction Syndrome  
304 (DRS) Leading to an Updated Form of Classification. *Vision Research* **50**, 2334–2347. doi:10.1016/j.visres.  
305 2010.08.019 (2010).
- 306 24. Brainard, D. H. The Psychophysics Toolbox. *Spatial Vision* **10**, 433–436 (1997).
- 307 25. Guizar-Sicairos, M., Thurman, S. T. & Fienup, J. R. Efficient Subpixel Image Registration Algorithms. *Optics*  
308 *Letters* **33**, 156–158. doi:10.1364/o1.33.000156 (2008).
- 309 26. Savitzky, A. & Golay, M. J. Smoothing and Differentiation of Data by Simplified Least Squares Procedures.  
310 *Analytical Chemistry* **36**, 1627–1639. doi:10.1021/ac60214a047 (1964).
- 311 27. Demer, J. L. The Orbital Pulley System: A Revolution in Concepts of Orbital Anatomy. *Annals of the New York*  
312 *Academy of Sciences* **956**, 17–32. doi:10.1111/j.1749-6632.2002.tb02805.x (2002).
- 313 28. Miller, J. M. Understanding and Misunderstanding Extraocular Muscle Pulleys. *Journal of Vision* **7**, 10.1–15.  
314 doi:10.1167/7.11.10 (2007).

- 315 29. Kasthurirangan, S., Markwell, E. L., Atchison, D. A. & Pope, J. M. MRI Study of the Changes in Crystalline  
316 Lens Shape with Accommodation and Aging in Humans. *Journal of Vision* **11**, 19. doi:10.1167/11.3.19 (2011).
- 317 30. Najmi, H. *et al.* The Correlation between Keratoconus and Eye Rubbing: A Review. *International Journal of*  
318 *Ophthalmology* **12**, 1775–1781. doi:10.18240/ijo.2019.11.17 (2019).
